# Supplementary material for: A facile microwave-hydrothermal approach towards highly photoluminescent carbon dots from goose feathers
Source: Royal Society of Chemistry journal article supplement (doi:10.1039/c4ra12077a), 2014-12-09
Supplement: c4ra12077a1.pdf [file c4ra12077a1.pdf]

## Support Information

### **A Facile Microwave-hydrothermal Approach towards Highly Photoluminescent Carbon Dots from Goose Feather**

Ruili Liu,<sup>a</sup> Jing Zhang,<sup>a</sup> Mengping Gao,<sup>a</sup> Zhilian Li,<sup>a</sup> Jinyang Chen,<sup>a</sup> Dongqing Wu,<sup>b</sup>  
and Ping Liu<sup>b</sup>

<sup>a</sup>Department of Chemical Engineering, School of Environment and Chemical Engineering, Shanghai University, Shangda Road 99, 200444, Shanghai, P. R. China.

<sup>b</sup>School of Chemistry and Chemical Engineering, Shanghai Jiao Tong University, Dongchuan Road 800, 200240, Shanghai, P. R. China

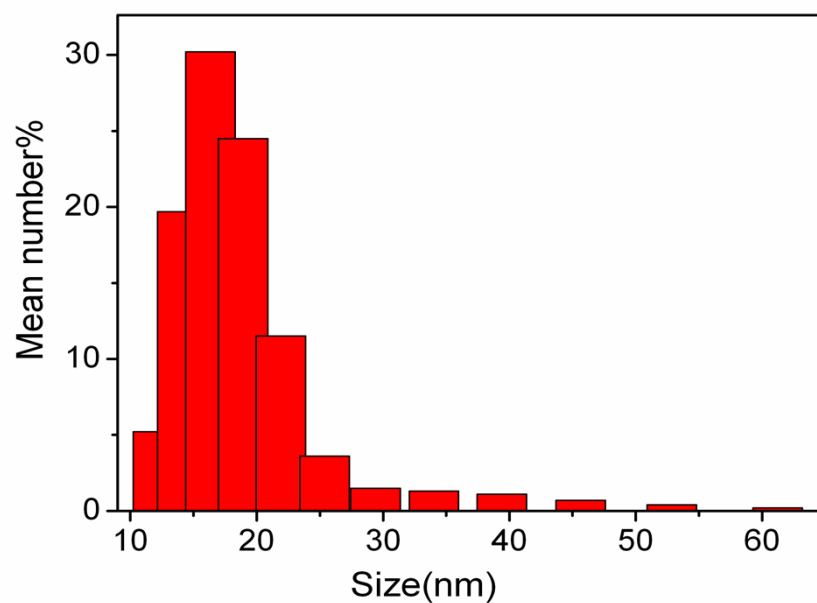

**Fig. S1** The DLS result of the CDs in aqueous solution.

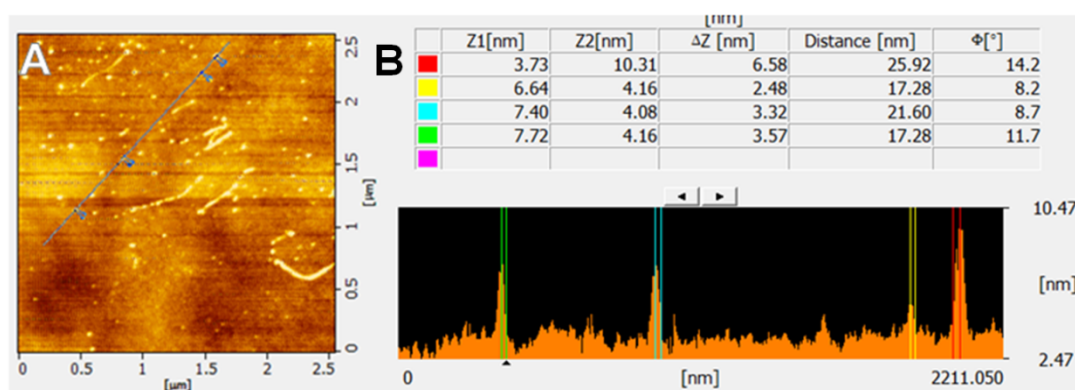

**Fig. S2** (A) AFM image of the CDs; (B) the cross-section analysis of the CDs.

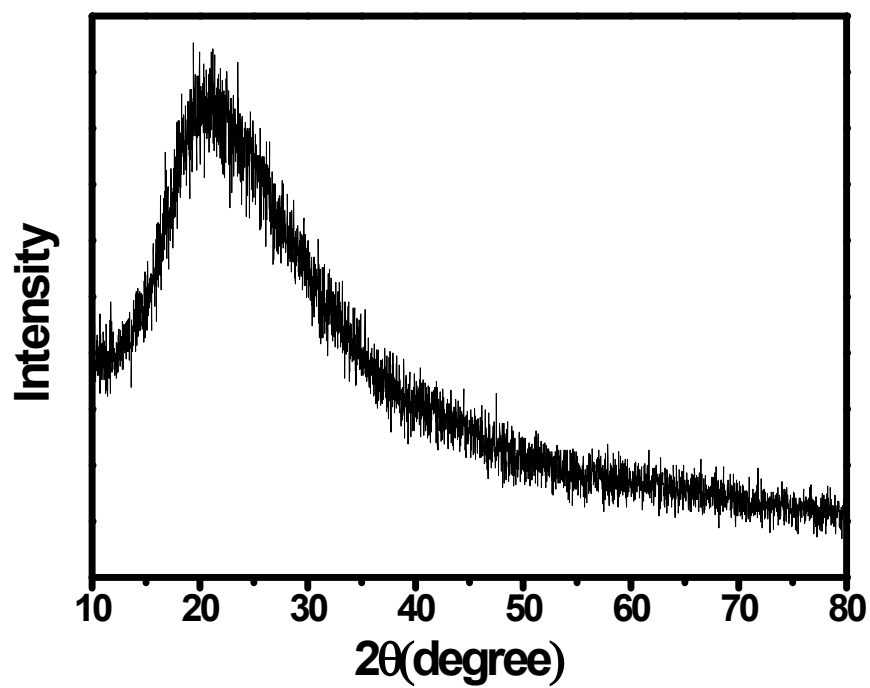

Fig. S3 XRD pattern of the CDs.

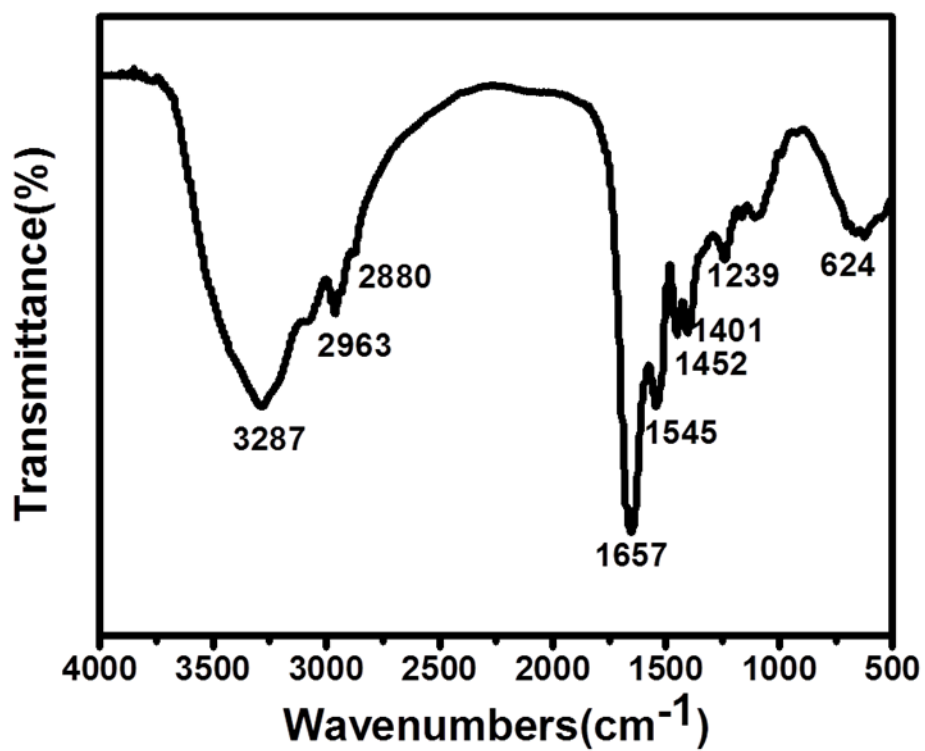

Fig. S4 FTIR spectra of the CDs.

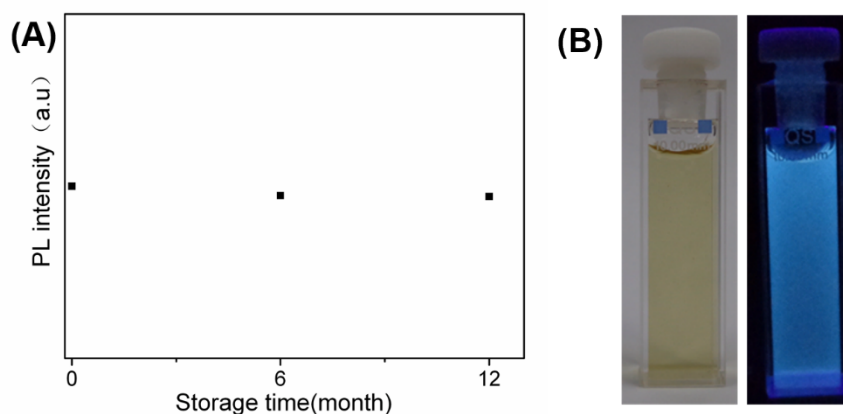

**Fig. S5** (A) Photostability of the CDs as a function of the storage time; (B) the photographs of the suspension of the CDs stored for one year under daylight (left) and excitation at 365 nm (right).

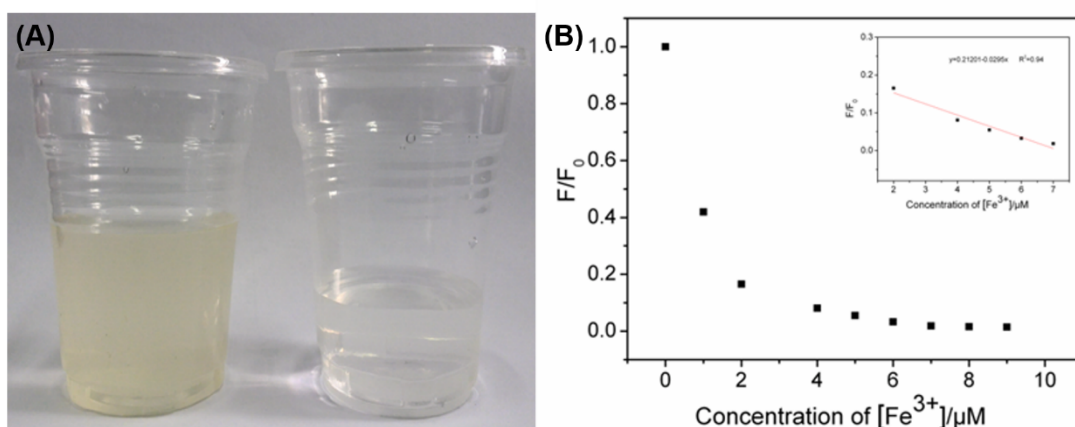

**Fig. S6** (A) Environmental water sample before (left) and after(right) filtration with 0.22  $\mu m$  filter membrane; (B) the relationship between the photoluminescence of the CDs and  $Fe^{3+}$  from 0 - 9  $\mu M$  in environmental water samples. Inset: a linear region of 2~7  $\mu M$  ( $F_0$  and  $F$  are the highest photoluminescence intensities of the CDs excited at 340 nm in the absence and presence of  $Fe^{3+}$ , respectively.)
